# Supplementary material
Source: PubMed Central journal article supplement (PMC5584695)
Supplement: JCB685106_supplementary_material.pdf [file JCB685106_supplementary_material.pdf]

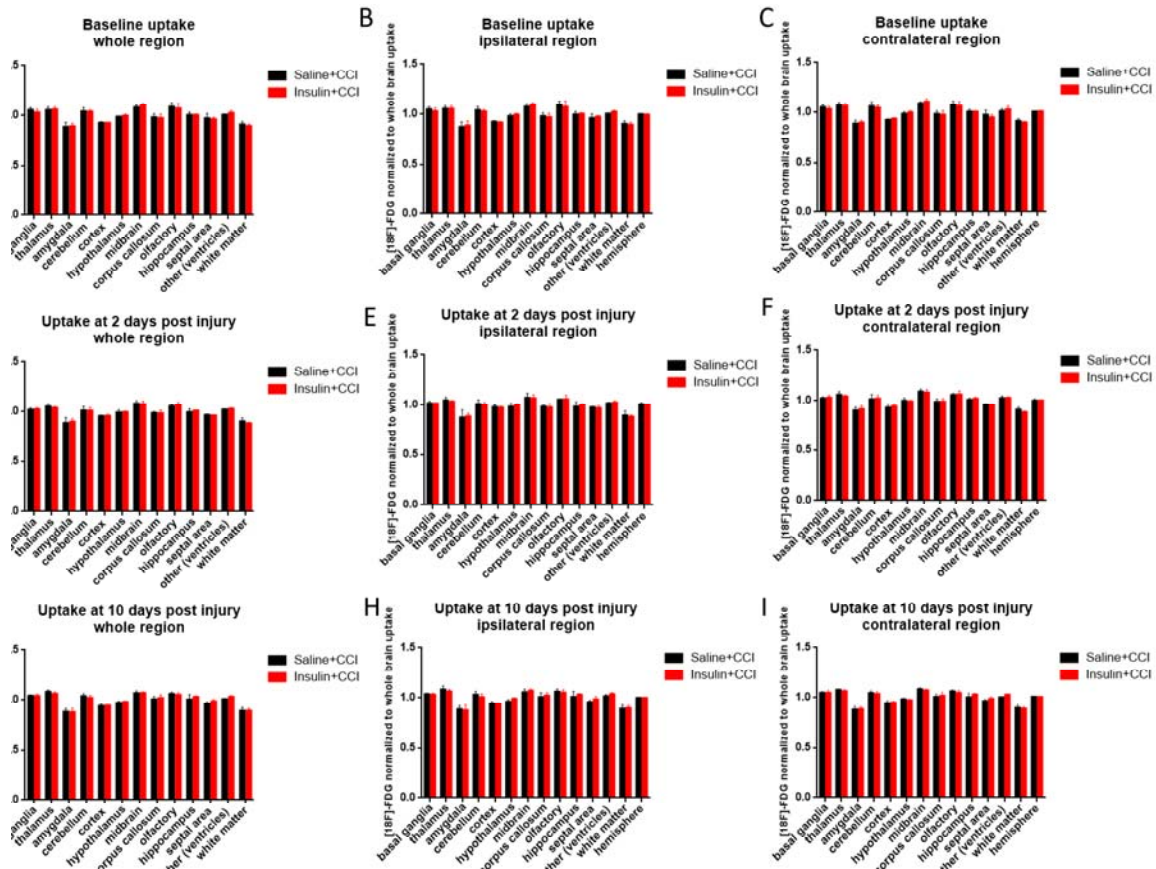

Supplementary Figure 1: [18F]-FDG uptake for all brain regions. Uptake was quantified at baseline (top row), 2 days post injury (middle row) and ten days post injury (bottom row). Values were collected using an atlas based analyses for the following regions: basal ganglia, thalamus, amygdala, cerebellum, cortex, hypothalamus, midbrain, corpus callosum, olfactory, hippocampus, septal area, other (ventricles), white matter, and hemisphere. These data for each time point are presented for the whole region (pooled values for ipsilateral and contralateral uptake) at baseline (a), 2 days post injury (d) and ten days post injury (g). For ipsilateral regions at baseline (b), 2 days post injury (e) and ten days post injury (h) and for contralateral regions baseline (c), 2 days post injury (f) and ten days post injury (i). All data are presented with error bars for standard deviation and n=6 per group.
